# Supplementary material for: Two tyrosine-based sorting signals in the Cx43 C-terminus cooperate to mediate gap junction endocytosis
Source: PubMed Central journal article supplement — Mol Biol Cell. 2013 Sep 15;24(18):2834–48. doi: 10.1091/mbc.E13-02-0111 (PMC3771946; doi:10.1091/mbc.e13-02-0111), 2013-09-15

# Supplemental Materials

*Molecular Biology of the Cell*

Fong et al.

**Table S1:** Time in hours required for GJ plaques assembled of wild type and AP-2 binding-impaired Cx43 mutants (S2, S3, S2+3) to constitutively turn over (assemble, mature, and being removed).

|      | wt             | S2 <sup>a</sup> | S3 <sup>b</sup> | S2+3 <sup>c</sup> |
|------|----------------|-----------------|-----------------|-------------------|
|      | 2 <sup>d</sup> | 5               | 8               | <b>21</b>         |
|      | 2              | 5               | 8               | 24                |
|      | 2              | 15              | <b>12</b>       | <b>25</b>         |
|      | 2              | <b>19</b>       | 12              | 25                |
|      | 4              | 25              | 12              | 25                |
|      | 4              | 25              | <b>17</b>       | <b>27</b>         |
|      | 4              | 30              | <b>17</b>       | 30                |
|      | 4              |                 | 17              | 33                |
|      | 5 <sup>e</sup> |                 | 20              | 40                |
|      | 5              |                 | 22              | 48                |
|      | <b>6</b>       |                 | 22              |                   |
|      | 6              |                 | 22              |                   |
|      | 6              |                 | 22              |                   |
|      | 8              |                 | 22              |                   |
|      | 10             |                 | 25              |                   |
|      | 10             |                 | 25              |                   |
|      |                |                 | 30              |                   |
| n    | 16             | 7               | 17              | 10                |
| Mean | 5              | 18              | 19              | 30                |
| SEM  | 1.4            | 3.7             | 1.3             | 2.7               |

<sup>a</sup>S2 mutant: Cx43-F<sup>268</sup>A-GFP

<sup>b</sup>S3 mutants: Cx43-Y<sup>286</sup>H-GFP, Cx43-ΔP<sup>283</sup>PGYKLV-GFP

<sup>c</sup>S2+3 mutants: Cx43-F<sup>268</sup>A+Y<sup>286</sup>H-GFP, Cx43-ΔL<sup>254-290</sup>-GFP, Cx43-ΔL<sup>254-CT</sup>-GFP

<sup>d</sup>Regular: GJ plaques already existed at start of imaging

<sup>e</sup>**Bold:** Recordings include GJ plaque formation and internalization

**Figure S1:** Basal levels of endogenous Cx43 were detected in HeLa cells (ATCC clone CCL-2). **(A)** HeLa cells were cultured in 3.5 cm diameter dishes and transfected with GFP-tagged and untagged wt Cx43 DNA constructs as described in Materials and Methods. Cells were lysed with 500  $\mu$ l of protein sample buffer/dish. Transfected and endogenous Cx43 proteins from 15  $\mu$ l of each sample (lysates of approximately 3000-6000 cells) were detected by Western blots using rabbit polyclonal antibodies (Cell Signaling Technology, Cat. No. 3512) **(A)**, or mouse monoclonal antibodies (Zymed, Cat. No. 138300) **(B)** directed against Cx43 as described in Materials and Methods. X-ray films were exposed to ECL in the dark for 5 minutes. Membranes were stripped and re-probed with mouse monoclonal antibodies directed against  $\alpha$ -tubulin to control for equal loading. Results indicate that total amount of endogenous Cx43 protein (lane 2) in the pools is ~10% (SEM  $\pm$ 3,  $p < 0.0001$ ) of the transfected Cx43 protein (CMV promoter) (lane 2, 3). Transfection efficiency in these experiments was about 20-30%. If transfection efficiency were 100%, the amount of endogenous Cx43 in the pool would have been 1-2% compared to transfected Cx43. **(C)** Immunofluorescence staining of endogenous Cx43 in HeLa cells using respective rabbit and mouse Cx43 antibodies performed as described in Materials and Methods. Representative images acquired using a 20x long distance lens are shown. Some GJ-like puncta and intracellular fluorescence and were detected using respective rabbit and mouse antibodies.

Rabbit anti-Cx43 CST, Cat. No. 3512      Mouse anti-Cx43 Zymed, Cat. No. 138300

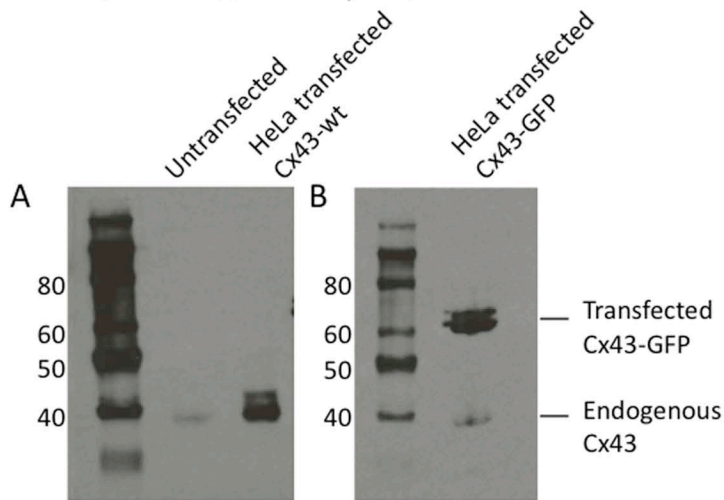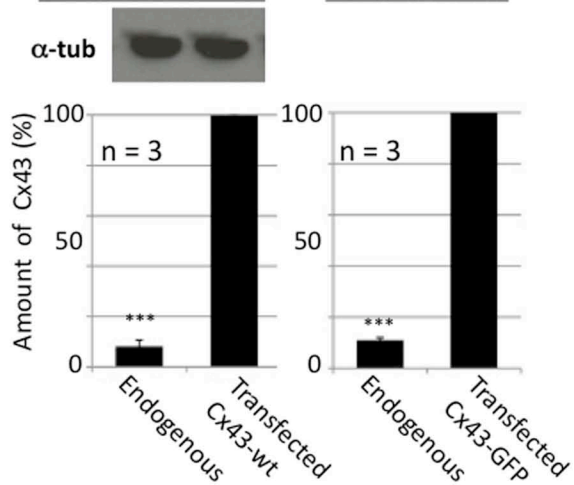

**C**

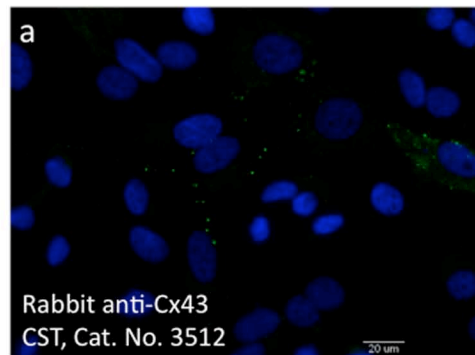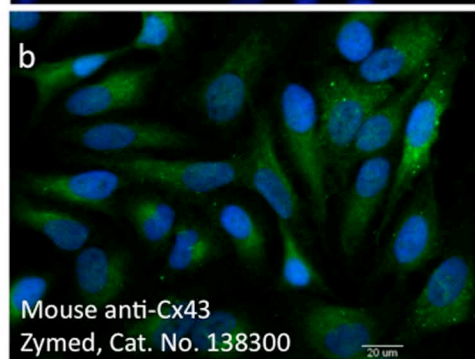

Supplement: supp_E13-02-0111_CombinedSupMats.pdf [file supp_E13-02-0111_CombinedSupMats.pdf]
